# Supplementary material
Source: publisher figshare collection journal article supplement (https://acs.figshare.com/ndownloader/files/4136659)
Supplement: Supplementary file 1 [file 4136659]

# Supporting Information for

## Oxidation-resistant Acidic Resins Prepared by Partial Carbonization as Cocatalysts in Synthesis of Adipic Acid

Huijuan Wei,<sup>†</sup> Hongbian Li,<sup>‡</sup> Yangqing Liu,<sup>†</sup> Peng Jin,<sup>†</sup> Xiangyu Wang<sup>\*,†</sup> and Baojun Li<sup>\*,†</sup>

<sup>†</sup> Institute of Industrial Catalysis, College of Chemistry and Molecular Engineering, Zhengzhou University, 100 Science Road, Zhengzhou 450001, P R China

<sup>‡</sup> National Center for Nanoscience and Technology, 11 Beiyitiao Street, Zhongguancun, Beijing 100190, P R China

\*Corresponding authors. E-mail: xiangyuwang@zzu.edu.cn and lbjfc@zzu.edu.cn

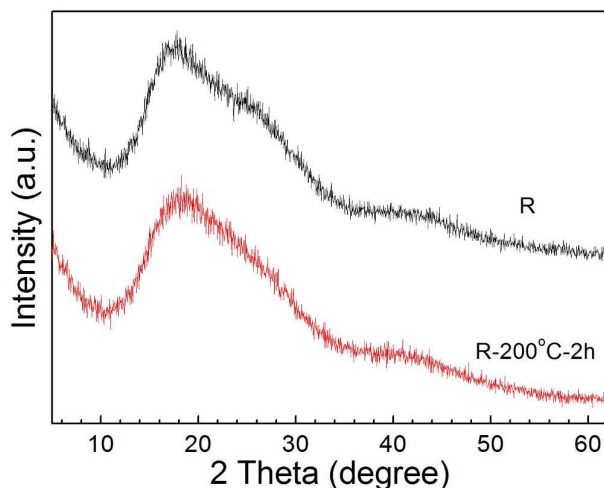

**Figure S1.** The XRD spectra of R and R-200°C-2h sample.

Powder X-ray diffraction (XRD) were performed on Panalytical X' pert PRO Diffractometer with Cu K $\alpha$  ( $\lambda=1.5406$  Å) and a scanning rate of  $1.2^{\circ} \text{ min}^{-1}$  in the 2 theta ranges from  $5^{\circ}$  to  $80^{\circ}$ .

For the R and R-200°C-2h sample, the XRD pattern both exhibit two broad, weak diffraction peaks (2 Theta=  $10\text{--}30^{\circ}$ ,  $35\text{--}50^{\circ}$ ), which are probably attributed to amorphous carbon composed of aromatic carbon.<sup>[S1,S2]</sup>

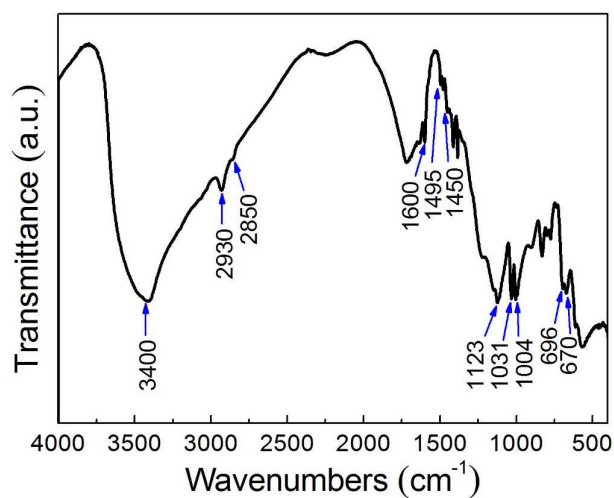

**Figure S2.** FT-IR spectrum of R-200°C-2h after the sixth reaction.

**Table S1.** The surface compositions of R and R-200°C-2h.

| Sample     | C (%) | O (%) | S (%) |
|------------|-------|-------|-------|
| R          | 71.7  | 22.9  | 5.4   |
| R-200°C-2h | 79.1  | 16.5  | 4.5   |

## References

- (S1) Hara, M.; Yoshida, T.; Takagaki, A.; Takata, T.; Kondo, J. N.; Hayashi, S.; Domen, K. *Angew. Chem. Int. Ed.* **2004**, *43*, 2955–2958.
- (S2) Suganuma, S.; Nakajima, K.; Kitano, M.; Yamaguchi, D.; Kato, H.; Hayashi, S.; Hara, M. *J. Am. Chem. Soc.* **2008**, *130*, 12787–12793.
